# Supplementary material for: A unified approach to dissecting biphasic responses in cell signaling
Source: eLife journal article supplement (doi:10.7554/elife.86520), 2023-12-06
Supplement: supp [file elife-86520-supp-v1.zip]

### Substrate and Enzyme Biphasic Response in the Random Double Site Modification (Separate kinase and separate phosphatase)

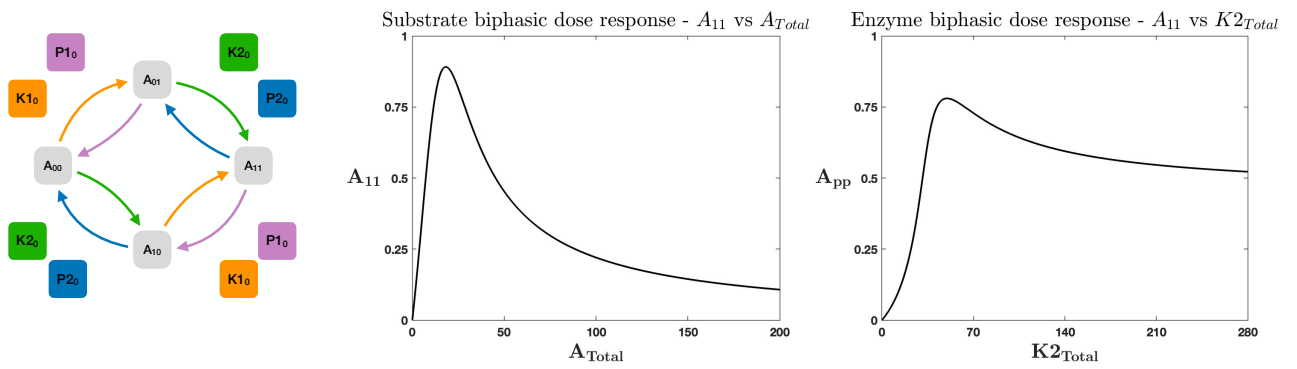

Figure 2 – figure supplement 2: **Biphasic responses in random double site modification network with separate enzymes effecting each modification.** While the ordered DSP with separate enzymes acting on each modification site is incapable of exhibiting any biphasic dose response, random ordered (de)modification exhibits both substrate (*left*) and enzyme (*right*) biphasic dose response. This illustrates how additional complexity (inherently) associated with enzyme mediated substrate modification (random) can further expand propensity for such networks containing them to generate biphasic dose response.
