# Supplementary material for: A unified approach to dissecting biphasic responses in cell signaling
Source: eLife journal article supplement (doi:10.7554/elife.86520), 2023-12-06
Supplement: supp [file elife-86520-supp-v1.zip]

## Biphasic Interaction within Feedback Network Motifs (Open System)

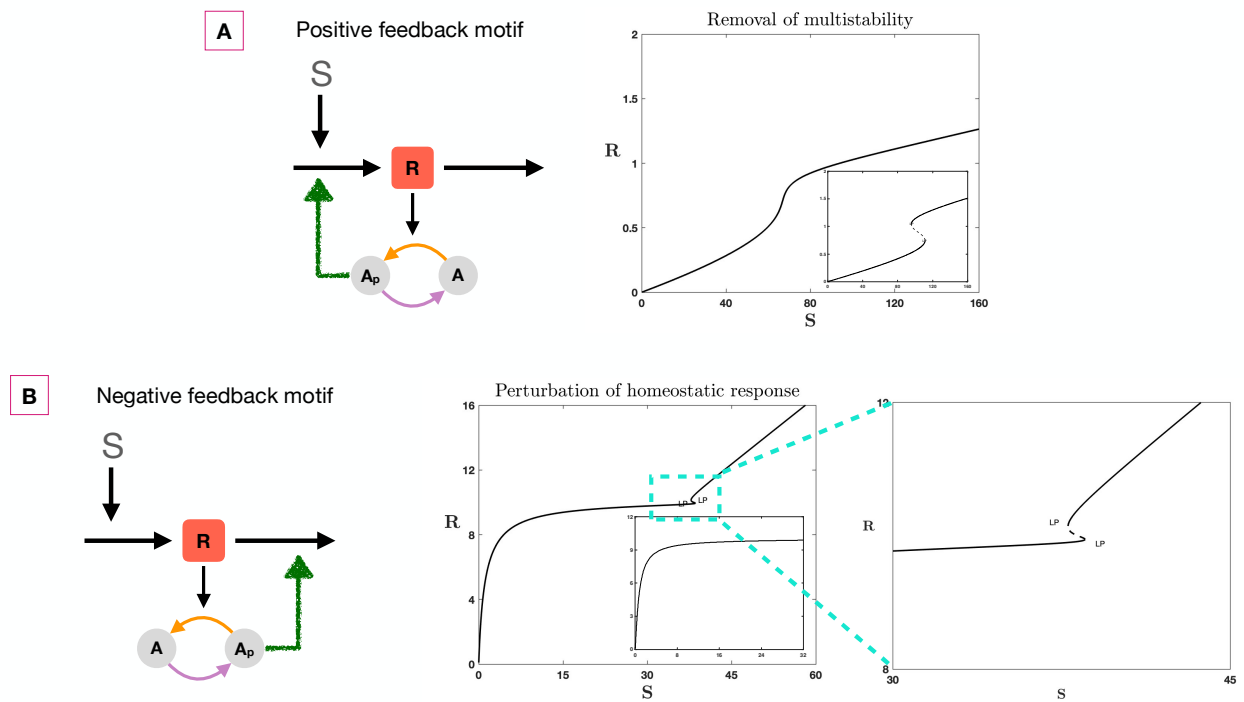

Figure 3 – figure supplement 1: **Effect of biphasic response in interactions within feedback network motifs (open systems)**: The figure shows introduction of novel behavior (bistability in NFB, see *B*), and removal of expected behavior (bistability in PFB, see *A*) even when the biphasic responses in interactions are present within open system feedback network motifs. This complements our analysis in the paper where similar results were shown with motifs constructed with closed system (see fig. 3). The inset plots show basal behavior without the biphasic interaction. *B* shows expanded region in the inset main plot. [Brown arrows in the network schematics represent biphasic interactions. LP: saddle node bifurcation. Solid lines and dotted lines denote steady and unstable steady states respectively.]
